# Supplementary material for: Visualizing reaction and diffusion in xanthan gum aerosol particles exposed to ozone
Source: Royal Society of Chemistry journal article supplement (doi:10.1039/c9cp03731d), 2019-01-01
Supplement: c9cp03731d1.pdf [file c9cp03731d1.pdf]

1 **Electronic Supplementary Information (ESI) for “Visualizing**  
2 **Reaction and Diffusion in Xanthan Gum Aerosol Particles**  
3 **Exposed to Ozone”**

4 Peter A. Alpert<sup>\*a</sup>, Pablo Corral Arroyo<sup>a,b</sup>, Jing Dou<sup>c</sup>, Ulrich K. Krieger<sup>c</sup>, Sarah S. Steimer<sup>d</sup>, Jan-David  
5 Förster<sup>e</sup>, Florian Ditas<sup>e</sup>, Christopher Pöhlker<sup>e</sup>, Stéphanie Rossignol<sup>f,g</sup>, Monica Passananti<sup>f,h,i</sup>,  
6 Sebastien Perrier<sup>f</sup>, Christian George<sup>f</sup>, Manabu Shiraiwa<sup>j</sup>, Thomas Berkemeier<sup>k</sup>, Benjamin Watts<sup>l</sup> and  
7 Markus Ammann<sup>\*a</sup>

8 <sup>a</sup>Laboratory of Environmental Chemistry, Paul Scherrer Institute, 5232 Villigen PSI, Switzerland

9 <sup>b</sup>Institute for Atmospheric and Climate Science, ETH Zürich, 8092 Zurich, Switzerland.

10 <sup>c</sup>Institute for Physical Chemistry, ETH Zürich, 8092 Zurich, Switzerland.

11 <sup>d</sup>Department of Chemistry, University of Cambridge, Cambridge, CB2 1EW, United Kingdom.

12 <sup>e</sup>Multiphase Chemistry Department, Max Planck Institute for Chemistry, 55128 Mainz, Germany.

13 <sup>f</sup>Univ. Lyon, Université Claude Bernard Lyon 1, CNRS, IRCELYON, F-69626, Villeurbanne, France

14 <sup>g</sup>Aix Marseille Université, CNRS, LCE UMR 7376, 13331 Marseille, France.

15 <sup>h</sup>Institute for Atmospheric and Earth System Research/Physics, Faculty of Science, University of  
16 Helsinki, 00710, Helsinki, Finland

17 <sup>i</sup>Dipartimento di Chimica, Università di Torino, Via Giuria 5, 10125 Torino, Italy

18 <sup>j</sup>Department of Chemistry, University of California, Irvine, CA 92617, United States

19 <sup>k</sup>School of Chemical & Biomolecular Engineering, Georgia Institute of Technology, Atlanta, GA 30332,  
20 United States

21 <sup>l</sup>Laboratory for Synchrotron Radiation-Condensed Matter, Paul Scherrer Institute, 5232 Villigen PSI,  
22 Switzerland

23 † Electronic Supplementary Information (ESI) available. See DOI: 10.1039/cXCP00000x/

24 \*Corresponding authors Peter.Alpert@psi.ch and Markus.Ammann@psi.ch

# 1 Detailed Methods

## 1.1 Particle preparation

Particles were generated from an ultrasonic nebulizer<sup>1</sup> containing a dilute aqueous solution of xanthan gum (XG) and FeCl<sub>2</sub> at concentrations of 0.1 mM and 1.0 mM, respectively, in ultrapure water (18 MΩ cm, MilliQ). XG dissolves easily leading to a pH of  $\sim 5$  in aqueous solution<sup>2</sup>. Mixed XG/FeCl<sub>2</sub> particles were carried in N<sub>2</sub> gas through a Nafion membrane diffusion drier, bipolar Kr-85 neutralizer and a custom built differential mobility analyzer (DMA) to select a dry mobility diameter of  $\sim 280$  nm. The relative humidity,  $RH$ , inside the DMA was about  $25 \pm 5\%$ . Mobility selected particles were impacted onto flat silicon nitride membranes with an aerosol flow of  $0.7 \text{ L min}^{-1}$ . Fe<sup>2+</sup> in particles exposed to ambient air completely oxidized within 1 day sitting open to the laboratory. To avoid this, particles were placed in a dry, dark and evacuated box immediately after impaction for storage and transport to the experimental station. The time between solution preparation, aerosol generation, impaction and storage was  $\sim 30$  min. Storage time under vacuum was between 30 min to 12 hour in addition. This ensured a high initial Fe<sup>2+</sup> concentration.

## 1.2 Microreactors

Helium was used as a carrier gas for both the PolLux environmental microreactor<sup>3</sup> and the MPI-C aerosol micro-reactor<sup>4</sup>. A fraction of the total dry He flow was diverted to a humidifier consisting of a temperature controlled chamber half filled with water. Nafion<sup>TM</sup> film separated the water and humidified He flow that exited the humidifier and mixed with the remaining dry flow. Dry and humidified He flow rates were adjusted depending on the desired  $RH$ . The  $RH$  and temperature,  $T$ , of the gas was measured with two calibrated sensors up and down stream of the microreactors to calculate the water partial pressure in the gas entering a microreactor. The cell temperature of  $20^\circ \text{C}$  was assumed equal to the particle temperature,  $T_p$ , and was kept constant using a continual cooling source and a controlled counter-heater. We performed regular checks of the deliquescence relative humidity of NaCl yielding an accuracy of  $\pm 2\%$  in  $RH$ . The gas phase ozone concentration,  $[\text{O}_3]_g$ , was measured at the outlet of each cell using a UV-absorption setup, which was calibrated against a commercial ozone monitor (Teledyne

51 Mo. T400) at  $T = 20$  °C and ambient pressure of 975 mbar with an accuracy  $< \pm 0.5\%$ .

52 The procedure for our experiments is as follows. Particles were generated, dried, impacted onto silicon  
53 nitride substrates and mounted in one of the two microreactors. Particle diameters on all samples were  
54 between 0.2 and 4.0  $\mu\text{m}$ . Then, the microreactor was mounted in the vacuum chamber for analysis  
55 with scanning transmission X-ray microscopy coupled with near-edge X-ray absorption fine structure  
56 spectroscopy (STXM/NEXAFS) described later. Using STXM/NEXAFS, the  $\text{Fe}^{2+}$  fraction,  $\alpha$ , was  
57 determined in vacuum, then at a pressure of 150 or 450 mbar under He only for the PolLux environmental  
58 microreactor and the MPI-C aerosol micro-reactor, respectively, and at pressure under He and exposed  
59 to  $\text{O}_2$  and humidity. After  $\text{O}_2$  exposure was completed, the UV lamp was switched on without any  
60 change to the sample flow. This resulted in increasing  $[\text{O}_3]_{\text{g}}$  in the microreactor as a function of  $t$  shown  
61 in Fig. S1. During  $\text{O}_2$  and  $\text{O}_3$  exposure, Fe oxidation state was continuously measured as described  
62 in the next sections. This procedure was applied to experiments where  $RH = 0, 40$  and  $80\%$ . At the  
63 end of the experiment at  $RH = 0\%$ , the ozone lamp was switched off allowing for sufficient time ( $\sim 10$   
64 min) to reduce  $[\text{O}_3]_{\text{g}}$  to background levels. Then,  $RH$  was increased to  $20\%$  without any change to  
65 the  $\text{O}_2$  flow and Fe oxidation state was continuously monitored over hours. Afterward, the UV lamp  
66 was switched on again to exposure the particles to  $\text{O}_3$  at  $RH = 20\%$ . This procedure was repeated for  
67  $RH = 60\%$ , thus the data for  $\text{O}_2$  and  $\text{O}_3$  exposure at  $RH = 0, 20$  and  $60\%$  was obtained from a single  
68 sample in succession. Experiments where  $RH = 40$  and  $80\%$  employed different samples generated from  
69 independently prepared solutions.

### 70 1.3 STXM/NEXAFS analysis

71 Transmitted photons were measured to determine optical density,  $OD$ , using STXM/NEXAFS. Images  
72 of the same particles were obtained at discrete X-ray energy steps and digitally aligned<sup>5</sup>. Hundreds of  
73 images acquired at small steps of about 0.1 or 0.2 eV are referred to as a “stack” of images. Averaging  
74 the  $OD$  over each pixel in an aligned stack that made up imaged particles as a function of X-ray energy  
75 yielded a NEXAFS spectrum. We note that acquiring a full stack ( $\sim 100$  images) to generate a NEXAFS  
76 spectrum typically took about 30 min. A second method to generate a NEXAFS spectrum was to scan  
77 a single line, referred to as a “line scan”, as opposed to imaging a field of view (FOV) for a stack.

78 We investigated two X-ray energy ranges, 278-320 eV and 700-735 eV, which are the C K-edge and Fe  
 79 L-edge absorption, respectively, and used stacks and linescans to generate full NEXAFS spectra seen in  
 80 Fig. 1 of the main text and in Fig. S2a. At the C K-edge, absorption peaks were identified in the spectra  
 81 that correspond to various bonding and oxygenated functionalities<sup>6</sup>. At the Fe L-edge, two absorption  
 82 peaks over an X-ray energy range of roughly 705 – 713 and 718 – 727 eV corresponding to  $L_3$   $2p_{3/2}$   
 83 and  $L_2$   $2p_{1/2}$  orbitals, respectively, were identified. The former has exceptional absorption and typically  
 84 exhibits an  $OD$  about 10 times that of the edge step, which we use to calculate the Fe oxidation state as  
 85 either ferrous ( $\text{Fe}^{2+}$ ) or ferric ( $\text{Fe}^{3+}$ ) with their peaks at X-ray energies of 707.9 and 709.6 eV. Generally  
 86 speaking, this dipole transition to 3d states has a large Coulomb interaction and thus is highly dependent  
 87 on the local electronic structure. Resolving power used here was  $\Delta E/E = 0.0018$ . This meant that we  
 88 were capable of resolving peaks separated by 1.3 eV at the Fe L-edge. Ferrous and ferric iron peaks are  
 89 separated by about 1.7 eV and thus, easily distinguished. When associated with other organic species or  
 90 water, the chemical environment surrounding Fe atoms may slightly alter the energy positions of these  
 91 peaks<sup>7,8</sup>. We note that it was impossible to generate particles on substrates with a pure  $\text{Fe}^{2+}$  content.  
 92 As previously discussed, particles were exposed to laboratory air when moved from the nebulizer to a  
 93 sealed vacuum container for transport to the PolLux beamline and again when mounting the particle  
 94 samples to the microreactors. A small, but non-negligible amount of oxidation took place. The presence  
 95 of  $\text{Fe}^{2+}$  and small amounts of  $\text{Fe}^{3+}$  was in turn, an advantage and used to identify peak X-ray absorption  
 96 energies for  $\text{Fe}^{2+}$  and  $\text{Fe}^{3+}$  prior to any  $\text{O}_3$  exposure.

#### 97 **1.4 Quantifying $\text{Fe}^{2+}$ fraction, $\alpha$**

98 The high contrast between the main absorption features of  $\text{Fe}^{2+}$  and  $\text{Fe}^{3+}$  allowed quantification of the  
 99 oxidation state of iron in aerosol particles. Moffet et al.<sup>8</sup> proposed a parameterization to quantify  $\text{Fe}^{2+}$   
 100 and  $\text{Fe}^{3+}$  in ambient iron and organic containing particles following

$$\alpha = \frac{[\text{Fe}^{2+}]}{[\text{Fe}_{\text{tot}}]} = \frac{c - dr}{c - a + br - dr}, \quad (\text{S1})$$

101 where  $a = 9.53548 \times 10^{-3}$ ,  $b = 3.02169 \times 10^{-3}$ ,  $c = 3.49723 \times 10^{-3}$  and  $d = 9.94950 \times 10^{-3}$  are constants.  
 102  $r$  is the background subtracted peak height  $OD$  ratio,

$$r = \frac{OD_{\text{Fe}^{2+}} - OD_{\text{pre}}}{OD_{\text{Fe}^{3+}} - OD_{\text{pre}}}, \quad (\text{S2})$$

103 where  $OD_{\text{Fe}^{2+}}$  is the peak height for  $\text{Fe}^{2+}$ ,  $OD_{\text{Fe}^{3+}}$  is the peak height for  $\text{Fe}^{3+}$  and  $OD_{\text{pre}}$  is the optical  
 104 density at the Fe pre-edge at X-ray energy between  $\sim 690 - 703$  eV. Using stacks to determine  $OD_{\text{pre}}$ ,  
 105  $OD_{\text{Fe}^{2+}}$  and  $OD_{\text{Fe}^{3+}}$  in eqn (S2) during oxidation would result in poor time resolution during  $\text{O}_3$  exposure.  
 106 Although a line scan took much less time (on the order of minutes) it could not provide a 2-D image  
 107 of particles and thus lacked spatial information. Therefore, it was necessary to perform a third type  
 108 of scan referred to here as a “map”, which used only a few  $OD$  images at the most important X-ray  
 109 energies (see Figs. S2a and b). This was advantageous because with a high 2-D spatial resolution, each  
 110 pixel was exposed to X-rays only a few times, thus limiting the dose. Taking maps at peak absorption  
 111 energies still allowed for observation of  $OD_{\text{pre}}$ ,  $OD_{\text{Fe}^{2+}}$  and  $OD_{\text{Fe}^{3+}}$  used in eqn (S2) as only peak heights  
 112 were required.

113 The time to acquire 4  $OD$  images per map as done in Figs. S2b and S2c was  $\sim 10$  min. In order to  
 114 shorten this time by half (and thus double the number of particles analyzed), only two X-ray images per  
 115 map were acquired during  $\text{O}_3$  exposure at observed  $\text{Fe}^{2+}$  and  $\text{Fe}^{3+}$  peaks to derive  $OD_{\text{Fe}^{2+}}$  and  $OD_{\text{Fe}^{3+}}$ .  
 116 The following linear relationship seen in Fig. S3 for 226 particles was derived as

$$OD_{\text{pre}} = m(\overline{OD}_{\text{Fe}^{2+}} + \overline{OD}_{\text{Fe}^{3+}}), \quad (\text{S3})$$

117 where  $m = 0.178 \pm 0.002$  is the fitted slope parameter and standard error,  $R^2 = 0.98$  and the root mean  
 118 square error  $\sigma_{\text{rms}, OD_{\text{pre}}} = \pm 0.01$ .  $\overline{OD}_{\text{Fe}^{2+}}$ ,  $\overline{OD}_{\text{Fe}^{3+}}$  and  $\overline{OD}_{\text{pre}}$  were averaged over all pixels in a single  
 119 particle. We then define the ratio,

$$r_{\text{raw}} = \frac{\overline{OD}_{\text{Fe}^{2+}}}{\overline{OD}_{\text{Fe}^{3+}}}, \quad (\text{S4})$$

120 and substitute into eqn (S2) to yield the following equation,

$$r = \frac{r_{\text{raw}} - m(r_{\text{raw}} + 1)}{1 - m(r_{\text{raw}} + 1)}. \quad (\text{S5})$$

121 Finally,  $r$  from eqn (S5) is substituted into eqn (S1) to obtain an average value of  $\alpha$ . Uncertainty in  $\alpha$   
122 has been calculated as the error on the average and propagated through quadrature. We acknowledge  
123 that in addition to random error, some systematic error can exist due to e.g. microscope alignment,  
124 minor instrument vibrations and extraneous noise in the electron beam used to generate X-rays. The  
125 use of thousands of particles, each having hundreds or thousands of pixels, was more than sufficient to  
126 evaluate the random error by observing the scatter in the data, which was about  $\pm 0.07$ . Error in  $\alpha$  was  
127 determined to be either the propagated error or  $\pm 0.07$ , whichever was larger.

## 128 1.5 Assessment of X-ray beam damage

129 In all experiments, we determined X-ray exposure for observing  $r$  as to not damage the particles. When  
130 X-rays irradiated particles which already experienced oxidation, photochemical reaction with X-ray light  
131 reduced  $\text{Fe}^{3+}$  back to  $\text{Fe}^{2+}$ . This was a potential bias in observed  $OD$  which would lead to  $\alpha$  higher than  
132 actual values. To quantify this bias, we repeated scans (stacks and linescans) on particles and observed  
133 changes in the NEXAFS spectra. We found that it was impossible to avoid X-ray induced Fe reduction  
134 (as seen in Fig. S2a) and simultaneously acquire NEXAFS spectra with sufficient signal. Therefore,  
135 stacks and linescans could not be used to quantify  $\alpha$ , however, they could be used to obtain the X-ray  
136 energy at peak  $OD$ . In no instance did we observe X-ray damage which oxidized  $\text{Fe}^{2+}$  to  $\text{Fe}^{3+}$  even in  
137 the presence of  $\text{O}_2$  or  $\text{O}_3$ .

138 X-ray exposure is defined here as the incident photon count,  $I_0$ , over a pixel, which was controlled  
139 by adjusting the time that the X-ray beam remained over a single pixel and the X-ray intensity. We  
140 took 4 consecutive maps, each having 4 energy points over the same FOV and observed  $OD_{\text{Fe}^{2+}}$  and  
141  $OD_{\text{Fe}^{3+}}$  seen in Fig. S2b, where  $I_0 = 250$  counts per pixel approximately for each energy. No change in  
142  $OD$  was observed as seen in Fig. S2b. Therefore, beam damage could be avoided up to  $I_0 = 1000$  counts  
143 per pixel, which was used to quantify  $\alpha$  without bias using maps. When  $I_0 = 800$  counts per pixel, we  
144 did observe changes in  $OD_{\text{Fe}^{2+}}$  and  $OD_{\text{Fe}^{3+}}$  after irradiating twice as seen in Fig. S2c. This implies that  
145 X-ray irradiation at  $I_0 = 1000$  counts per pixel for 4-energy maps was close to optimal to simultaneously  
146 minimize X-ray beam damage and measure the greatest absorption signal. As previously mentioned, we  
147 derived  $\alpha$  using 2-energy maps as opposed to 4-energy maps used for testing beam damage, and thus

148 are certain to have avoided it when acquiring data.

## 149 **1.6 Particle exposure to O<sub>2</sub> and O<sub>3</sub>**

150 Particles were exposed to O<sub>2</sub> prior to O<sub>3</sub> for all experiments. Figure S4 shows the change in  $\alpha$  over O<sub>2</sub>  
151 exposure time where each data point was determined from an average of about 5-25 particles in a single  
152 image. The error bars on each point demonstrate the propagated error, which is typically smaller than  
153  $\pm 0.07$  as previously mentioned. Figure S5 shows  $\alpha$  for each particle irrespective of time as a function  
154 of circle equivalent particle diameter,  $d_p$ . Error bars are the propagated error and appear much smaller  
155 than the data scatter. The standard deviation of  $\alpha$  in Fig. S5 was determined and plotted as dashed  
156 lines in Fig. S4. Calculated  $\alpha$  values all fell within this uncertainty range, which led us to place a  
157 conservative limit on our uncertainty of  $\pm 0.07$ . After O<sub>2</sub> exposure experiments were finished, the UV  
158 lamp was switched on causing an increase in O<sub>3</sub> concentration over time as seen in Fig. S1. This error  
159 derived for O<sub>2</sub> exposure was also applied to O<sub>3</sub> exposure experiments.

## 160 **1.7 Modeled 3-D radial profiles and column integrated 2-D profiles**

161 The 2-D column integrated values of  $\alpha$  were determined from STXM/NEXAFS, however it was necessary  
162 to compare with those derived from the KM-SUB model. This was accomplished by first determining  
163 the volume of every modeled spherical shell projected onto a 2-D grid point with the same resolution as  
164 the images acquired from STXM/NEXAFS. Each shell over a grid box (pixel) contributes a fraction of  
165 the total volume extending from the silicon nitride surface to the top of the particle. Therefore,  $\alpha$  for  
166 a single grid point is calculated as the volume weighted average of each shell piece within a grid point.  
167 Figure S6 shows a graphical representation of a modeled spherical particle and a projected volume of  
168 a shell onto a pixel in the  $x - y$  plane. The KM-SUB model predicted 3-D radial concentrations in  
169 spherical shells having variable thickness. An arbitrary pixel having one corner at coordinates  $(x, y)$   
170 has the opposite corner at  $(x + \Delta x), (y + \Delta y)$ , where  $\Delta x = \Delta y = 35$  nm is the spatial resolution from  
171 STXM/NEXAFS. For all shells, we integrated the sphere equation in Cartesian coordinates over all  
172 pixels from  $r = 0 \rightarrow r_i$ , where  $r_i$  is the outside diameter of  $i^{\text{th}}$  shell. For a single pixel, we subtracted  
173 the difference in adjacent spherical volumes to derive the projected spherical shell volume. Finally, we

174 computed a volume weighted average in  $\alpha$  in a single pixel over all shells. A pixel at the center of a  
 175 modeled particle with  $d_p = 0.5 \mu\text{m}$ , would have the contribution of  $\alpha$  values from all modeled shells.  
 176 However, a pixel extending 35 nm from the particle perimeter, would only have a volume contribution  
 177 from modeled layers extending 35 nm from the particle surface. The 2-D projected  $\alpha$  calculated for  
 178 pixels extending from the center to the perimeter was then directly compared with observations.

179 Model predicted 3-D profiles in  $\alpha$  were much sharper than those in 2-D. At  $RH = 60\%$  for example,  
 180  $\alpha$  dropped by  $\sim 0.5$  over a 500 nm particle radius in 3-D after 1 hr of reaction. The conversion to  
 181 2-D profiles yielded a drop in  $\alpha$  by  $\sim 0.2$  for the same length scale. Despite the integration described  
 182 above, 2-D profiles remain highly sensitive to changes in 3-D as seen in Fig. S7. Hypothetically speaking,  
 183 depletion over  $t$  from  $\alpha = 0.9$  to 0.5 (Fig. S7a) could potentially look completely uniform throughout the  
 184 entire volume (Fig. S7c) or completely inhomogeneous with 2 spherical shell regions, e.g. having  $\alpha = 0$  in  
 185 the outer shell and 0.9 in the inner shell (Fig. S7b). These two cases would result in a homogeneous or a  
 186 sharply increasing 2-D  $\alpha$  profile (Fig. S7d). This degree of homo- or inhomogeneity was never observed,  
 187 and instead was always in between these extremes. We note that a spatial inversion of our data was not  
 188 performed, i.e. from observed 2-D column integrated profiles to 3-D radial profiles. This would require  
 189 data smoothing, constrained values or use of assumed functional forms because error and data scatter in  
 190 inverting 2-D to 3-D profiles would propagate cumulatively from the exterior to the interior of particles  
 191 potentially growing to infinity.

## 192 1.8 Parameters used in the KM-SUB model

193 We used a net bulk reaction

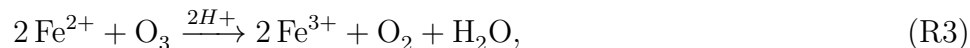

194 where  $k_{R3} = 3.7 \times 10^5 \text{ M}^{-1} \text{ s}^{-1}$  or  $6.2 \times 10^{-16} \text{ cm}^3 \text{ s}^{-1}$  to model bulk  $\text{O}_3$  reaction in our particles. The  
 195 surface reaction rate coefficient,  $k_{\text{slr1}}$ , was assumed to be proportional to  $k_{R3}$  on a natural logarithmic  
 196 scale with a proportionality constant derived from the ratio between bulk and surface reaction of  $\text{O}_3$   
 197 with shikimic acid<sup>1</sup>. We set  $k_{\text{slr1}} = \exp(\delta_{\text{sh}} \ln k_{R3}) = 6.3 \times 10^{-14} \text{ cm}^2 \text{ s}^{-1}$ , where  $\delta_{\text{sh}} = 0.868$  is the ratio  
 198 between the surface and bulk reaction rate of shikimic acid with  $\text{O}_3$  on a natural log scale. Parameters  
 199 for  $\text{O}_3$  utilized in KM-SUB are taken from previous work<sup>9</sup> and include the surface self reaction rate



200 constant,  $k_{\text{slr}2}$  [ $\text{cm}^2 \text{s}^{-1}$ ], the surface accommodation coefficient,  $\alpha_{\text{s},0}$ , the desorption lifetime,  $\tau_{\text{d},\text{O}_3}$  [s],  
 201 the adsorption cross section for  $\text{O}_3$ ,  $\sigma_{\text{O}_3}$  [ $\text{cm}^2$ ], and the gas phase diffusion coefficient,  $D_{\text{g},\text{O}_3}$  [ $\text{cm}^2 \text{s}^{-1}$ ], at  
 202 150 mbar. The surface area occupied by an adsorbed Fe ion was  $\sigma_{\text{Fe}} = 2 \times 10^{-16} \text{cm}^2$ , and was equivalent  
 203 to the surface area of a sphere of the size of the  $\text{Fe}^{2+}$  ion in solution<sup>10</sup>. Parameters that depend on  $RH$   
 204 include the bulk to surface transfer rate coefficient,  $k_{\text{bs},\text{O}_3}$ , the surface to bulk transfer rate coefficient,  
 205  $k_{\text{sb},\text{Fe}}$ , and the equilibrium surface to bulk concentration ratio,  $K_{\text{bs}}$ , were determined from the following  
 206 parameterizations fitted to previous values<sup>9</sup>, where

$$k_{\text{bs},\text{O}_3} [\text{cm s}^{-1}] = 0.6904 + 1.1675 e^{35.6235 \left( \frac{RH}{100} - 0.8369 \right)}, \quad (\text{S6})$$

$$\ln k_{\text{sb},\text{Fe}} [\text{s}^{-1}] = -9.2911 + 7.0439 \frac{RH}{100} - 5.4626 \left( \frac{RH}{100} \right)^2 - e^{30.7316 \left( \frac{RH}{100} - 0.8484 \right)}, \quad (\text{S7})$$

208 and

$$\ln K_{\text{bs}} [\text{cm}] = -19.8434 - 1.5613 \frac{RH}{100} + 3.1616 \left( \frac{RH}{100} \right)^2, \quad (\text{S8})$$

209 which are shown in Fig. S8. Parameter units above are given in brackets. Water uptake of XG as a  
 210 function of  $RH$  has been previously quantified using a hygroscopicity factor,  $\kappa = 0.08$ <sup>11</sup>. We calculated  
 211 the water concentration in particles assuming only XG contributes to water uptake and neglected water  
 212 uptake due to  $\text{FeCl}_2$ .

## 213 2 Detailed Results and Discussion

### 214 2.1 Parameterization of diffusion coefficients and Henry's Law constants.

215 We use a Vignes type equation to derive an expression for the fitting parameters continuous in  $RH$   
 216 following

$$\log D_{\text{O}_3} = (x_{\text{w}} \alpha_{x_{\text{w}}}) \log D_{\text{O}_3}^{\circ} + (1 - x_{\text{w}} \alpha_{x_{\text{w}}}) \log D_{\text{O}_3}(RH = 0\%), \quad (\text{S9})$$

$$\log D_{\text{Fe}} = (x_{\text{w}} \alpha_{x_{\text{w}}}) \log D_{\text{Fe}}^{\circ} + (1 - x_{\text{w}} \alpha_{x_{\text{w}}}) \log D_{\text{Fe}}(RH = 0\%), \quad (\text{S10})$$

$$\log H_{\text{O}_3} = (x_{\text{w}} \alpha_{x_{\text{w}}}) \log H_{\text{O}_3}^{\circ} + (1 - x_{\text{w}} \alpha_{x_{\text{w}}}) \log H_{\text{O}_3}(RH = 0\%), \quad (\text{S11})$$

219 and

$$\ln \alpha_{x_w} = (1 - x_w)^2 [C + 3D - 4D(1 - x_w)], \quad (\text{S12})$$

220 where  $x_w$  is the mole fraction of water and  $D_{\text{O}_3}(RH = 0\%)$ ,  $D_{\text{Fe}}(RH = 0\%)$ ,  $H_{\text{O}_3}(RH = 0\%)$ ,  $C$  and  $D$   
221 are fitting parameters given in Table S1. Other parameters given in Table S1 are the diffusion coefficient  
222 of  $\text{O}_3$  in water,  $D_{\text{O}_3}^\circ$ , Henry's law coefficient of  $\text{O}_3$  in water,  $H_{\text{O}_3}^\circ$ , and diffusion coefficient of Fe in water,  
223  $D_{\text{Fe}}^\circ$ . A mixing rule was also derived for comparison following

$$\log H_{\text{O}_3} = wt_w \log H_{\text{O}_3}^\circ + (1 - wt_w) \log H_{\text{O}_3}(RH = 0\%), \quad (\text{S13})$$

224 where  $wt_w$  is the weight fraction of water in the particles. Equation (S13) was determined without any  
225 fitting parameters since  $H_{\text{O}_3}^\circ$  is taken from previous literature<sup>9,12</sup> and  $H_{\text{O}_3}$  at  $RH = 0\%$  was derived  
226 from KM-SUB. We found that eqn (S11) is a better representation and recommended for use to describe  
227  $\text{O}_3$  solubility in XG.

## 228 **2.2 Reactive uptake coefficient calculated from the KM-SUB model**

229 In addition to deriving aerosol internal composition, KM-SUB also calculated the reactive uptake of  $\text{O}_3$ ,  
230  $\gamma$ , as a function of  $t$  and  $RH$  is shown in Fig. S9. Initially,  $\gamma = 0.5$  due to surface accommodation,  
231 then obtaining values on the order of  $10^{-4}$  when absorption equilibrium was established. As reaction  
232 continued over minutes to hours when  $[\text{O}_3]_{\text{g}}$  rose,  $\gamma$  fell as the concentration of  $\text{Fe}^{2+}$  dropped near  
233 the surface. Unfortunately, gas phase loss of  $\text{O}_3$  to aerosol surfaces or uptake coefficients could not be  
234 measured with our current setup. We suggest that by measuring changes in gas phase composition and  
235 measuring depth resolved aerosol composition with nanometer resolution, would also provide constraints  
236 on the other elementary steps in this heterogeneous reaction system, such as surface accommodation,  
237 a postulated surface self-reaction rate constant, a second-order loss process on the surface surface and  
238 surface saturation which we were not sensitive to in this study. Together with internal composition  
239 derived using STXM/NEXAFS, we speculate that it may be possible to treat all kinetic parameters as  
240 free parameters for a global optimization.

## 2.3 Model sensitivity to diffusion and solubility parameters

The sensitivity of parameters  $D_{\text{O}_3}$ ,  $D_{\text{Fe}}$  and  $H_{\text{O}_3}$  to reproduce observed gradients was tested by varying one parameter at a time by a few orders of magnitude with respect to their optimized values in the KM-SUB model while keeping the other two constant. Then, the sum of squared residual values (RSS) was calculated between modelled and observed 2-D profiles. Figure S10 shows the percent difference of RSS from the minimum value,  $\text{RSS}_{\text{fit}}$ . This is presented as  $\Delta\text{RSS}/\text{RSS}_{\text{fit}}$  in Fig. S10, where  $\Delta\text{RSS} = \text{RSS} - \text{RSS}_{\text{fit}}$ . When parameters were varied,  $\Delta\text{RSS}/\text{RSS}_{\text{fit}}$  increased either symmetrically obtaining a parabolic shape or asymmetrically. When  $\Delta\text{RSS}/\text{RSS}_{\text{fit}} = 20\%$ , the corresponding range in parameters was typically about 1 order of magnitude or less. The smaller the parameter range to satisfy  $\Delta\text{RSS}/\text{RSS}_{\text{fit}} = 20\%$ , the more sensitive the fit was to that particular parameter. In Fig. S10i for example, increasing or decreasing  $H_{\text{O}_3}$  at  $RH = 43\%$  caused the RSS to drastically increase, and the parameter range to satisfy  $\Delta\text{RSS}/\text{RSS}_{\text{fit}} < 20\%$  was small compared to most others. In Fig. S10h, increasing  $D_{\text{Fe}}$  by 1 order of magnitude caused a 40% difference in RSS. At  $RH = 0\%$ , we found more than one local minimum for  $D_{\text{Fe}}$  as seen in Fig. S10b. However, we are confident that our optimized value represents a global minimum as described later. Notice in Fig. S10n that RSS continually increased when  $D_{\text{Fe}}$  was decreased, however RSS increased to a plateau at about  $\Delta\text{RSS}/\text{RSS}_{\text{fit}} = 5\%$  when  $D_{\text{Fe}}$  was increased. In general, larger values of  $D_{\text{Fe}}$  would tend to cause more uniform profiles in  $\alpha$ . Figure 3e in the main text shows that profiles were already fairly uniform under these conditions, and increasing  $D_{\text{Fe}}$  to find a better fit would make little difference in RSS. In other words, our fit was relatively insensitive to increases in  $D_{\text{Fe}}$  for  $RH = 80\%$ , although a unique minimum was found, giving confidence in our parameter estimate.

We could not find a unique minimum value for  $D_{\text{O}_3}$  and  $H_{\text{O}_3}$  at  $RH = 0\%$  due to computational reasons. Decreasing the values of these parameters with respect to their optimized value always resulted in increasing RSS and thus a lower limit where  $\Delta\text{RSS}/\text{RSS}_{\text{fit}} = 20\%$  was found. However, we could not perform simulations for  $D_{\text{O}_3}$  or  $H_{\text{O}_3}$  at higher than optimized values. The KM-SUB model uses a fixed number of layers and layer spacing defined at the start of the simulation of chemical reaction and molecular diffusion. Accurate predictions were only possible if there are a sufficient number of layers to resolve a gradient in either  $\text{O}_3$  or  $\text{Fe}^{2+}$ . We have found that for higher  $D_{\text{O}_3}$  or  $H_{\text{O}_3}$  parameters, gradients in ozone reached greater and greater depths over time. For  $RH = 0\%$  only, sensitivity testing

269 required an unreasonable number of fixed layers and surpassed the computational ability available to  
270 us. To resolve this, the total number of layers should dynamically change in time in which layers split  
271 for better resolution and merge for less resolution whenever it is needed. Due to most model sensitivity  
272 appearing symmetric, we choose a symmetric sensitivity range for  $D_{\text{O}_3}$  and  $H_{\text{O}_3}$  at  $RH = 0\%$ .

273 We also wished to investigate a global sensitivity when varying more than one parameter simulta-  
274 neously. Due to limits on computational ability, we could only investigate multi-parameter sensitivity  
275 for  $RH = 40\%$ . First, we randomly sampled  $D_{\text{O}_3}$  and  $H_{\text{O}_3}$  thousands of times creating parameter pairs,  
276 which were then used to calculate RSS. Then, we used 2-D linear interpolation to generate a gridded  
277 RSS surface as a function of  $D_{\text{O}_3}$  and  $H_{\text{O}_3}$ . Finally, we applied smoothing using 2-D convolution. The  
278 contour plot of the RSS surface in Fig. S11a clearly shows that  $D_{\text{O}_3}$  and  $H_{\text{O}_3}$  are highly correlated and  
279 in general, a clear minimum cannot be determined. Minimum RSS values appear to fall on a line defined  
280 by the product  $\log_{10} H_{\text{O}_3} \sqrt{D_{\text{O}_3}} \simeq -7.7$  indicated in Fig. S11a. This is due to our reactive system being  
281 in the regime of reacto-diffusive limitation. A curvature in minimum RSS values deviating from this line  
282 is seen for  $\log_{10} D_{\text{O}_3} < -7$  when the contours appear to gradually align horizontally. This is due to  $\alpha$   
283 approaching a homogeneous distribution as a result of  $D_{\text{O}_3}$  becoming so high. Although it is not entirely  
284 clear from the contour plot, minimum RSS values increased slightly from about  $1.4 \times 10^3$  to  $2.8 \times 10^3$   
285 when  $D_{\text{O}_3}$  increased from  $10^{-9}$  to  $10^{-2} \text{ cm}^2 \text{ s}^{-1}$  meaning that  $H_{\text{O}_3}$  should be greater than  $\sim 10^{-4} \text{ mol}$   
286  $\text{cm}^{-3} \text{ atm}^{-1}$ . Considering that  $D_{\text{O}_3}^\circ$  is a physical upper limit of  $D_{\text{O}_3}$  for  $RH < 100\%$ , these results are  
287 reasonable and line with the finding that  $\text{O}_3$  solubility is typically greater in organic liquids than in  
288 water. Our optimized parameters value are indicated by the black cross and satisfy this condition.

289 Previously, Berkemeier *et al.*<sup>9</sup> found that  $D_{\text{O}_3}$  and  $H_{\text{O}_3}$  were highly correlated and that a unique  
290 global minimum in RSS could only be obtained when fixing the bulk reaction rate coefficient. Our bulk  
291 reaction rate coefficient ( $k_{R3}$ ) was fixed, however unique  $\text{O}_3$  transport and solubility parameters were  
292 not found. Although, our fitting algorithm found a global minimum we cannot rule out that another  
293 pair of parameters which satisfies  $\log_{10} H_{\text{O}_3} \sqrt{D_{\text{O}_3}} \simeq -7.7$  can fit our data just as well.

294 We also determined our model sensitivity when all three parameters were allowed to vary simulta-  
295 neously. RSS contours are shown in Fig. S11b as a function of  $D_{\text{Fe}}$  and the product  $H_{\text{O}_3} \sqrt{D_{\text{O}_3}}$ . The  
296 isoline  $\log_{10} H_{\text{O}_3} \sqrt{D_{\text{O}_3}} = -7.7$  is also plotted. We found multiple local minima in this parameter space  
297 and a clear global minimum. Our fitted parameters are again plotted as the black cross in Fig. S11b and

298 appear exactly at the global minimum. From this sensitivity analysis we make two conclusions. The  
 299 first is that, our observed 2-D profiles of  $\alpha$  were a good enough constraint that a unique value of  $D_{\text{Fe}}$   
 300 could be found to minimize the residuals. Second, we found that although  $D_{\text{O}_3}$  and  $H_{\text{O}_3}$  were coupled,  
 301 their product  $H_{\text{O}_3}\sqrt{D_{\text{O}_3}}$  could be constrained.

## 302 **2.4 Experimental and model derived parameters in the reacto-diffusive** 303 **framework**

304 In order to derive an analytical solution for  $\alpha$  to compare with our observations, we first define the net  
 305 flux of  $\text{O}_3$  in the gas phase into the condensed phase as

$$J_{\text{net}} = \frac{\gamma\omega}{4}[\text{O}_3]_{\text{g}}, \quad (\text{S14})$$

306 where  $\gamma$  is the reactive uptake coefficient and  $\omega$  is the mean thermal velocity of  $\text{O}_3$ . It is important to  
 307 note that eqn (S14) is the net flux that results in a loss of gas phase  $\text{O}_3$  because  $\gamma$  is defined as the  
 308 probability that a molecular collision on an aerosol particle surface results in an irreversible loss from  
 309 the gas phase. The first order loss rate of  $\text{O}_3$  from the gas phase is then

$$\frac{d[\text{O}_3]_{\text{g}}}{dt} = -\frac{\gamma\omega}{4}[\text{O}_3]_{\text{g}}N_{\text{p}}S_{\text{p}}, \quad (\text{S15})$$

310 where  $N_{\text{p}}$  is the number of particles per volume of air and  $S_{\text{p}}$  is the surface area of a single particle such  
 311 that the product  $N_{\text{p}}S_{\text{p}}$  is the total surface area of aerosol particles per volume of air. Implicit to eqn  
 312 (S14) and (S15) is that net  $\text{O}_3$  loss in the gas phase equals the  $\text{Fe}^{2+}$  loss or

$$\frac{d[\text{Fe}^{2+}]_{\text{g}}}{dt} = \frac{d[\text{O}_3]_{\text{g}}}{dt}, \quad (\text{S16})$$

313 where  $[\text{Fe}^{2+}]_{\text{g}}$  is the number of  $\text{Fe}^{2+}$  atoms in the particle phase per unit volume of air. Typically,  $[\text{Fe}^{2+}]_{\text{g}}$   
 314 is not considered and so a conversion to the more familiar particle phase concentration is as follows,

$$[\text{Fe}^{2+}]_{\text{g}} = [\text{Fe}^{2+}]N_{\text{p}}V_{\text{p}}, \quad (\text{S17})$$

315 where  $[\text{Fe}^{2+}]$  is previously defined as the number of  $\text{Fe}^{2+}$  atoms in the particle phase per unit volume of  
 316 particle phase and  $V_p$  is the volume of a single particle such that the product  $N_p V_p$  is the total volume  
 317 of aerosol particles per volume of air. Substituting eqn (S16) and (S17) into eqn (S15) yields

$$\frac{d[\text{Fe}^{2+}]}{dt} = -\frac{\gamma\omega}{4}[\text{O}_3]_g \frac{S_p}{V_p}. \quad (\text{S18})$$

318 From the 3-D radial profiles derived by the KM-SUB model,  $\text{O}_3$  reaction was predicted to have occurred  
 319 in a thin shell below the surface. Therefore we follow the rate limiting case described in Worsnop *et al.*<sup>13</sup>  
 320 that the uptake of  $\text{O}_3$  is controlled by a fast reaction within the reacto-diffusive length much smaller  
 321 than the particle radius. Following previous studies<sup>13-15</sup>,

$$\gamma = \frac{4H_{\text{O}_3}RT_p}{\omega} \sqrt{D_{\text{O}_3}k_{R3}[\text{Fe}^{2+}]}, \quad (\text{S19})$$

322 where  $R$  is the universal gas constant. When substituting in eqn (S19) into (S18), the square-root  
 323 dependence on the depletion of  $\text{Fe}^{2+}$  in a particle can be written as

$$\frac{d[\text{Fe}^{2+}]}{dt} = -k^D \sqrt{[\text{Fe}^{2+}]}, \quad (\text{S20})$$

324 where

$$k^D = -H_{\text{O}_3}[\text{O}_3]_g RT_p \sqrt{D_{\text{O}_3}k_{R3}} \frac{6}{d_p}, \quad (\text{S21})$$

325 is the equation for the reacto-diffusive rate constant<sup>1</sup>. We note that  $S_p/V_p$  of half spheres on a flat plate  
 326 is  $6/d_p$ . Solving eqn (S20) and substituting in eqn (S21) and  $\alpha$  from eqn (S1) yields,

$$2(\sqrt{\alpha} - \sqrt{\alpha_0}) = -H_{\text{O}_3}RT_p \sqrt{\frac{D_{\text{O}_3}k_{R3}}{[\text{Fe}_{\text{tot}}]}} \frac{6}{d_p} \int_0^t [\text{O}_3]_g dt. \quad (\text{S22})$$

327 Rearranging eqn (S22) and again recognizing that  $\phi(t) = \int_0^t [\text{O}_3]_g dt$  results in the following relationship,

$$\frac{d_p}{3RT_p} \frac{[\text{Fe}_{\text{tot}}] (\sqrt{\alpha} - \sqrt{\alpha_0})}{\phi(t) \sqrt{k_{R3}}} = H_{\text{O}_3} \sqrt{D_{\text{O}_3}}. \quad (\text{S23})$$

328 We calculated  $\alpha$  from observations for each particle exposed to  $\text{O}_3$  to determine the product  $H_{\text{O}_3} \sqrt{D_{\text{O}_3}}$

329 shown in Fig. S12, where  $H_{\text{O}_3}$  is the  $RH$  dependent Henry's Law coefficient and  $D_{\text{O}_3}$  is the  $RH$  depen-  
330 dent diffusion coefficient for  $\text{O}_3$ . This product was our only unknown in the reacto-diffusive framework  
331 as described in the main text. Values that varied more than 3 times the median absolute deviation  
332 are indicated in Fig. S12. The area of each particle was determined from STXM/NEXAFS images to  
333 calculate particle circle equivalent diameter,  $d_p$ . Approximating all particles as semi-spheres on a flat  
334 plate, we calculated their surface to volume ratio,  $S_p/V_p = 6/d_p$ . The product of the fitted parameters  
335 from KM-SUB, is shown as the dotted line in Fig. S12 to compare with observations.

### 3 Tables

Table S1: Fitting parameters for the Vignes-type equation (eqns (S9)-(S12)). The subscript “x” represents either O<sub>3</sub> or Fe.

|                  | $D_x^\circ /$<br>$\text{cm}^2 \text{ s}^{-1}$ | $D_x(RH = 0\%) /$<br>$\text{cm}^2 \text{ s}^{-1}$ | $H_x^\circ /$<br>$\text{mol cm}^{-3} \text{ atm}^{-1}$ | $H_x(RH = 0\%) /$<br>$\text{mol cm}^{-3} \text{ atm}^{-1}$ | $C$  | $D$   |
|------------------|-----------------------------------------------|---------------------------------------------------|--------------------------------------------------------|------------------------------------------------------------|------|-------|
| $D_{\text{O}_3}$ | $1.90 \times 10^{-5a}$                        | $7.45 \times 10^{-18}$                            |                                                        |                                                            | 1.73 | -0.17 |
| $H_{\text{O}_3}$ |                                               |                                                   | $1.20 \times 10^{-5b}$                                 | $3.93 \times 10^{-2}$                                      | 1.21 | -0.50 |
| $D_{\text{Fe}}$  | $7.19 \times 10^{-6c}$                        | $4.53 \times 10^{-18}$                            |                                                        |                                                            | 0.67 | -1.15 |

<sup>a</sup>Berkemeier *et al.*<sup>9</sup>, Smith and Kay<sup>12</sup>

<sup>b</sup>Sander<sup>16</sup>

<sup>c</sup>Vanýsek<sup>17</sup>



## 337 4 Figures

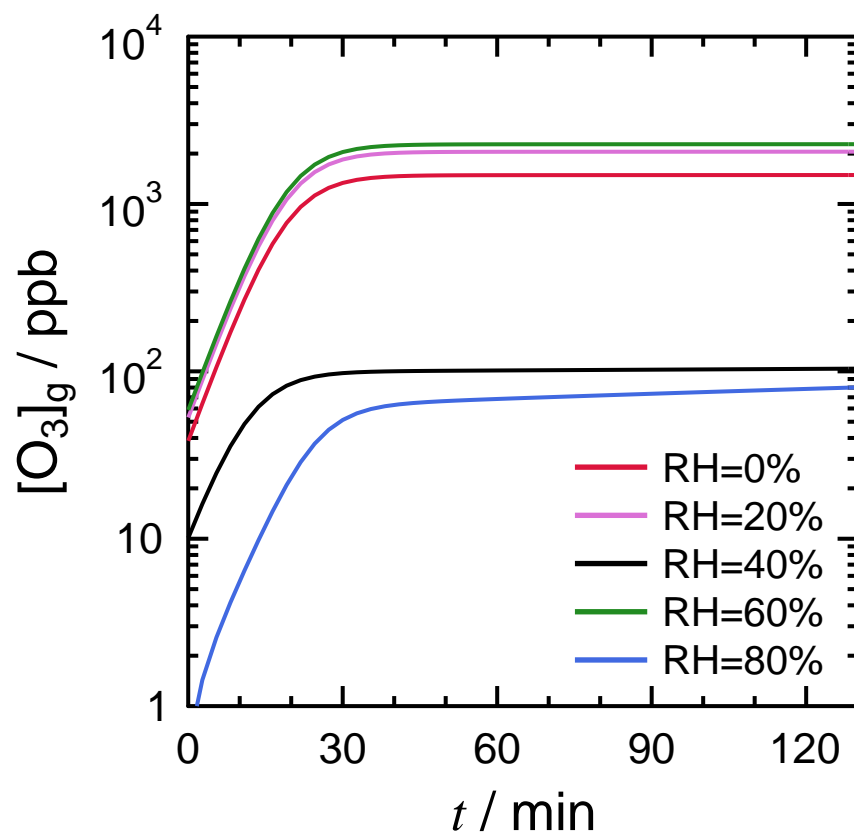

Figure S1: The observed gas phase ozone concentration,  $[O_3]_g$ , at standard temperature and pressure as continuous functions in time,  $t$ , for all experiments used the KM-SUB model. Relative humidity,  $RH$ , for each experiment is indicated.

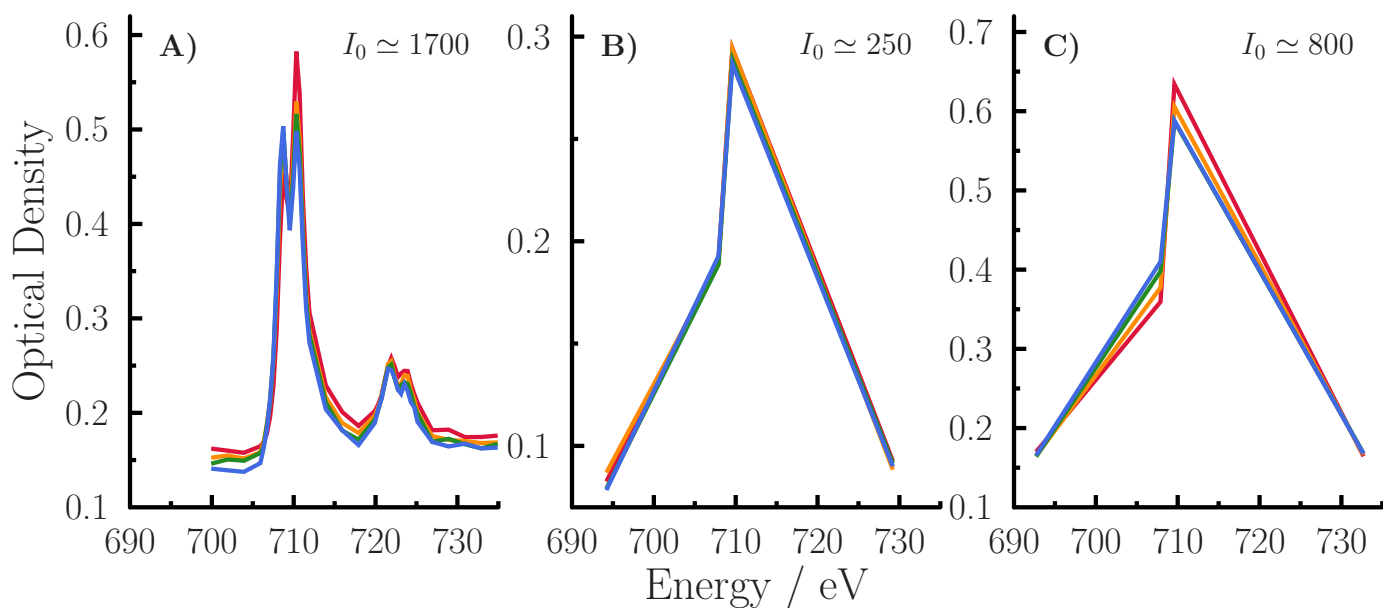

Figure S2: Damage assessment of X-ray exposed particles of xanthan gum (XG) mixed with  $\text{FeCl}_2$ . Blue, green, orange and red colors were acquired one after another and indicate increasing damage. a) A full near edge X-ray absorption fine structure (NEXAFS) spectra over the same particle is shown where each pixel was irradiated with approximately 1700 photons at 50 energy points. b) A map (4 energy points) of particles where each pixel was irradiated with approximately 250 photons. c) A map of particles where each pixel was irradiated with approximately 800 photons.

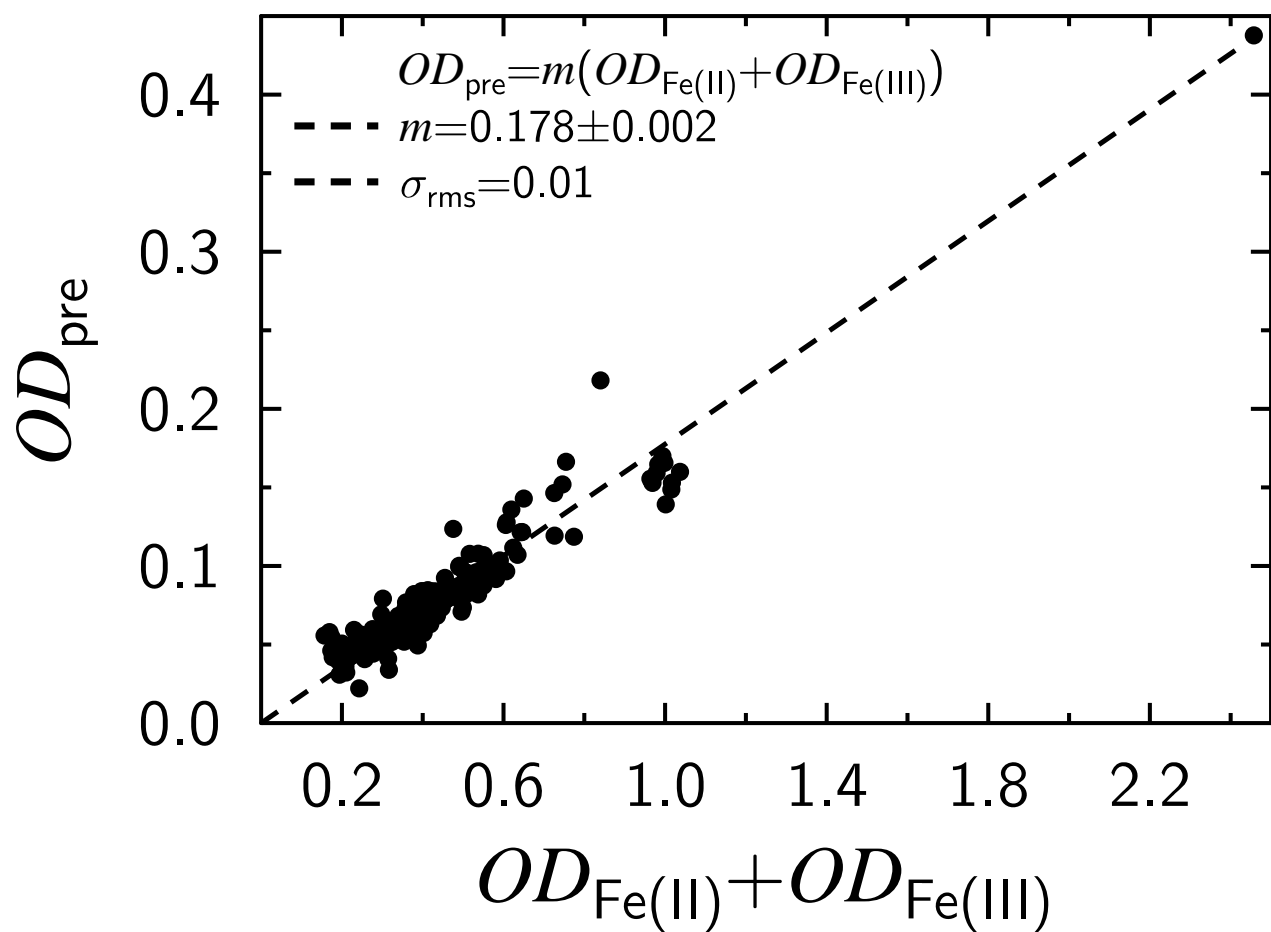

Figure S3: Average optical density derived at the Fe pre-edge,  $OD_{\text{pre}}$ , as a function of the sum of optical density at the  $\text{Fe}^{2+}$  and  $\text{Fe}^{3+}$  peak at 707.8 and 709.5 eV, respectively, or  $OD_{\text{Fe}^{2+}} + OD_{\text{Fe}^{3+}}$ . Each symbol is the average over an individual particle. The dashed line is a fit to the linear equation indicated in the figure.

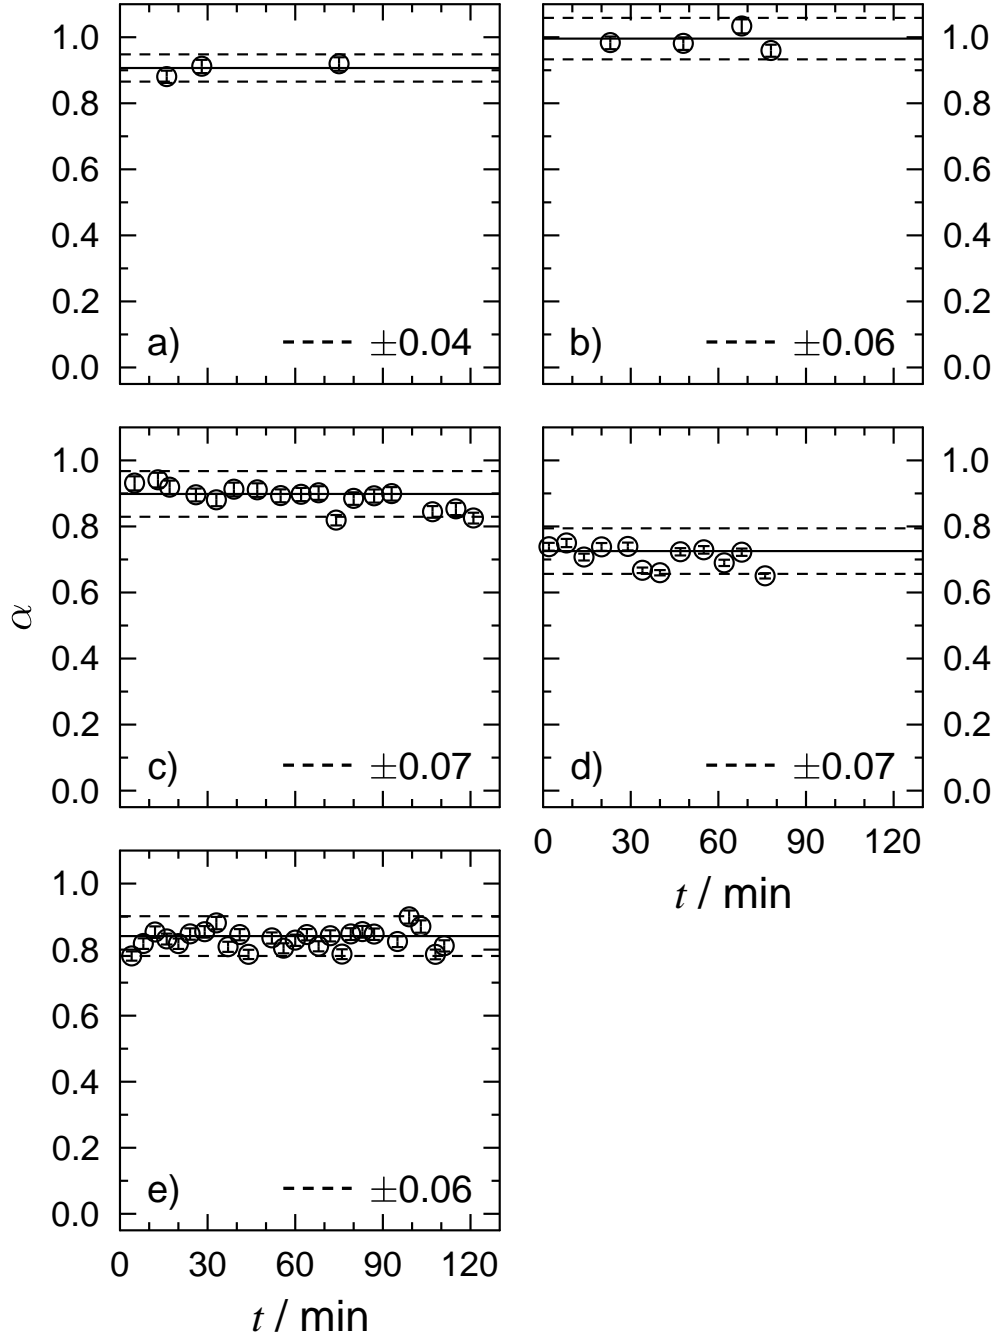

Figure S4: Measured  $\text{Fe}^{2+}$  fraction,  $\alpha$ , as a function of time,  $t$ , during oxygen exposure for a)  $RH = 0$ , b) 22, c) 43, d) 60 and e) 80%. Each data point is determined from approximately 5-25 particles. The error bar indicates the error on the average value propagated from X-ray photon counting statistics. The solid line is the average value of individual particles from Fig. S5. The dotted lines are the standard deviation of  $\alpha$  for individual particles shown in Fig. S5.

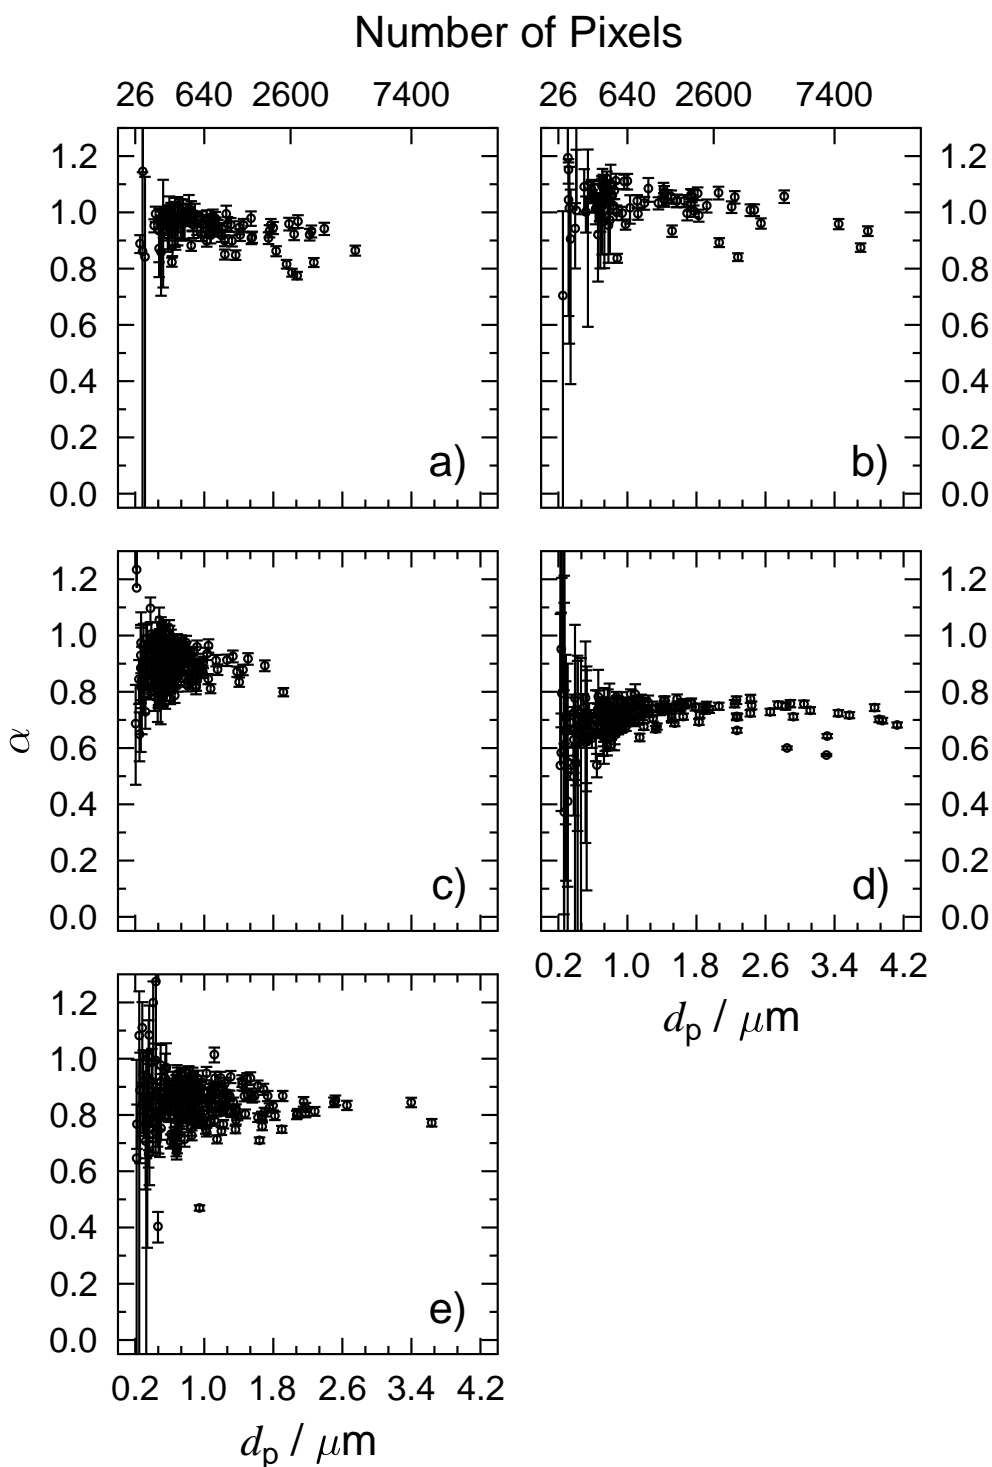

Figure S5: Measured  $\text{Fe}^{2+}$  fraction,  $\alpha$ , as a function of particle diameter,  $d_p$ , during  $\text{O}_2$  exposure for a)  $RH = 0$ , b) 22, c) 43, d) 60 and e) 80%. Each data point is an average over a single particle where the number of pixels per particle is given in the top abscissa. The data here was also used to determine averages in Fig. S4. Error bars indicate the error on the average value propagated from X-ray photon counting statistics. The standard deviation of  $\alpha$  for individual particles is not shown here, but included in Fig. S4.

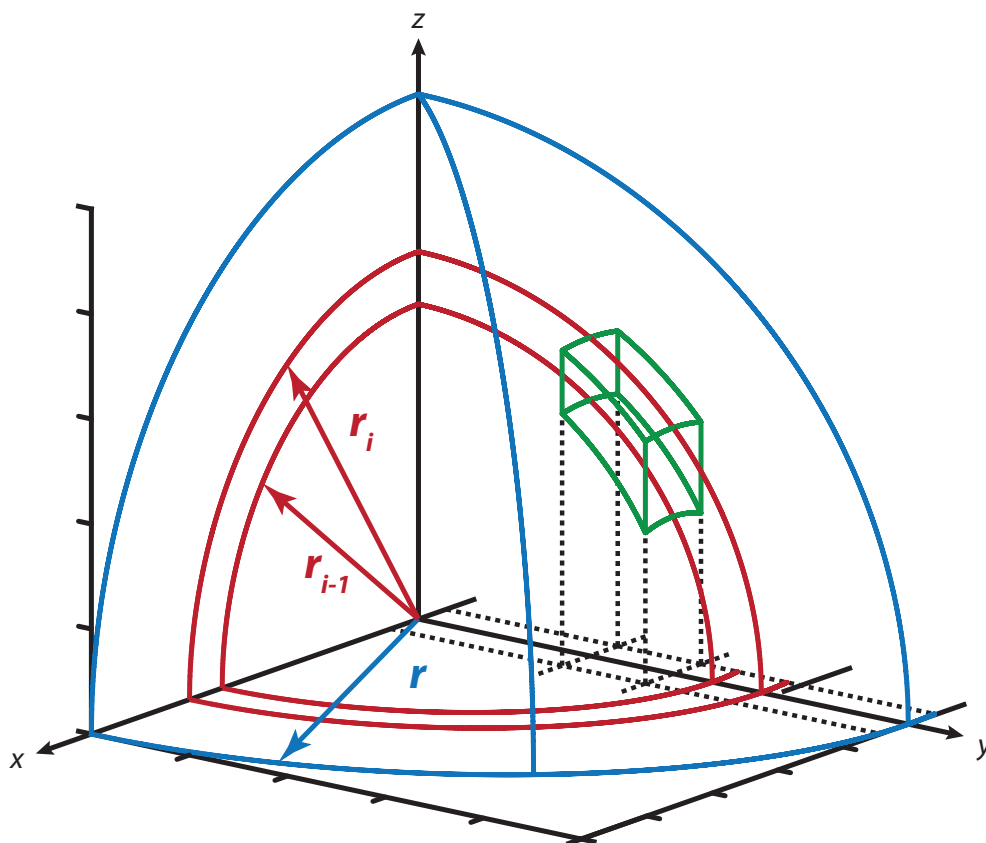

Figure S6: Geometric representation of a 2-D projection on a grid box of a finite volume from a spherical shell outlined in green inside of an spherical aerosol particle. The particle radius is  $r$  and outlined in blue. The shell outside and inside diameter is  $r_i$  and  $r_{i-1}$ , respectively, and outlined in red. Black solid lines are the axis and black dashed lines indicate the grid box.

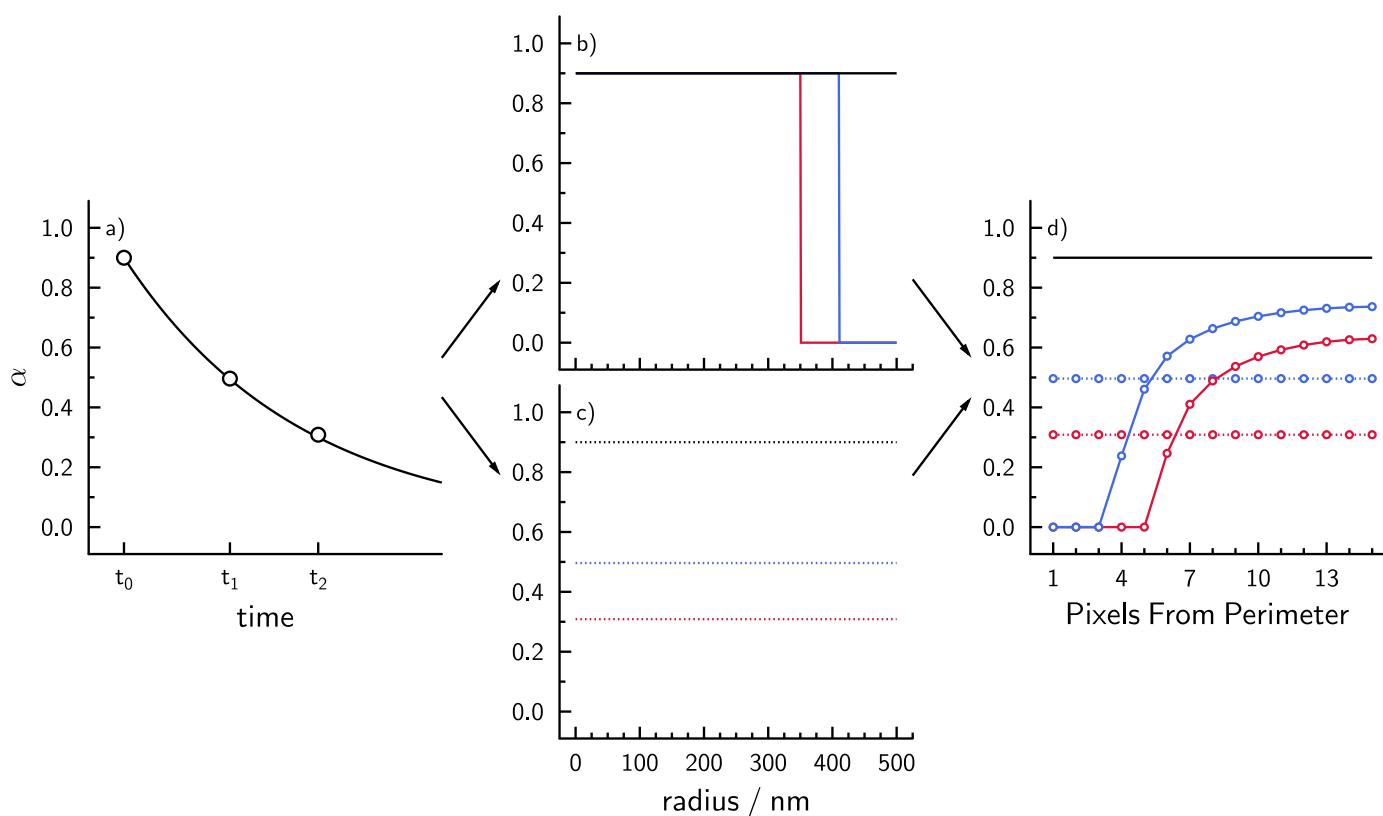

Figure S7: Examples of uniform and inhomogeneous 3-D radial and 2-D column integrated profiles of Fe<sup>2+</sup> fraction,  $\alpha$ . A hypothetical decay of  $\alpha$  over time is shown in a) where  $t_0$  is the initial value and  $t_1$  and  $t_2$  are at later arbitrary times. The symbols and line represent possible measurements and model predictions of  $\alpha$  averaged over all particles. Radial particle profiles of  $\alpha$  in 3-D are shown which are b) completely inhomogeneous and c) uniform, where black, blue and red color correspond to  $t_0$ ,  $t_1$  and  $t_2$ . When averaged over the entire particle,  $\alpha$  in both b) and c) are equivalent and shown in a). Column integrated profiles are shown in d) where solid and dotted lines are from calculated from b) and c) respectively.

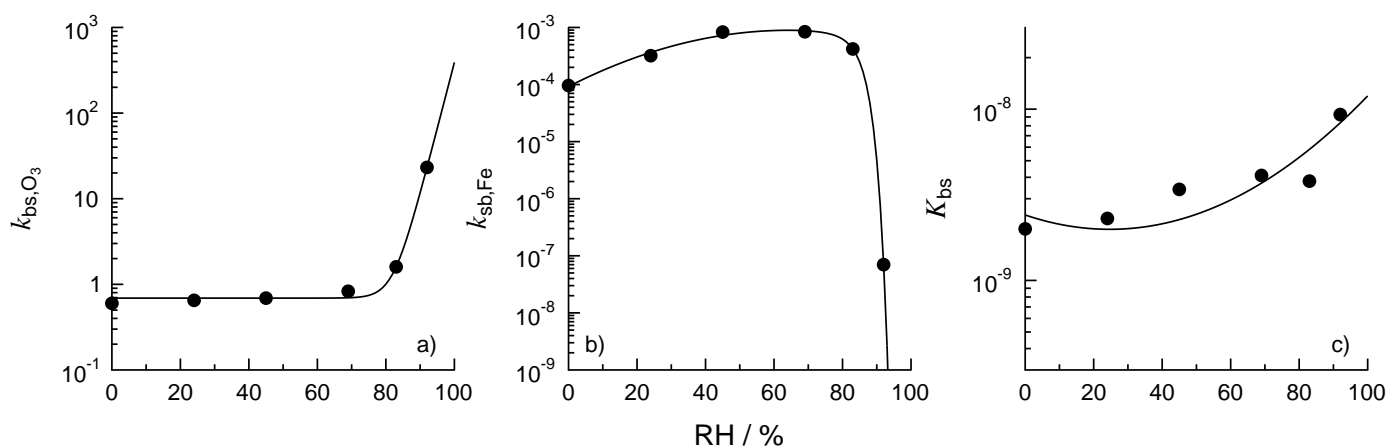

Figure S8: Relative humidity,  $RH$ , dependent parameters used in the KM-SUB model. These parameters are the bulk to surface transfer rate coefficient for  $O_3$ ,  $k_{bs,O_3}$ , the surface to bulk transfer rate coefficient,  $k_{sb}$ , and the surface equilibrium constant,  $K_{bs}$ . Symbols are taken from Berkemeier *et al.*<sup>9</sup> and solid lines are parameterizations as a function of  $RH$ .



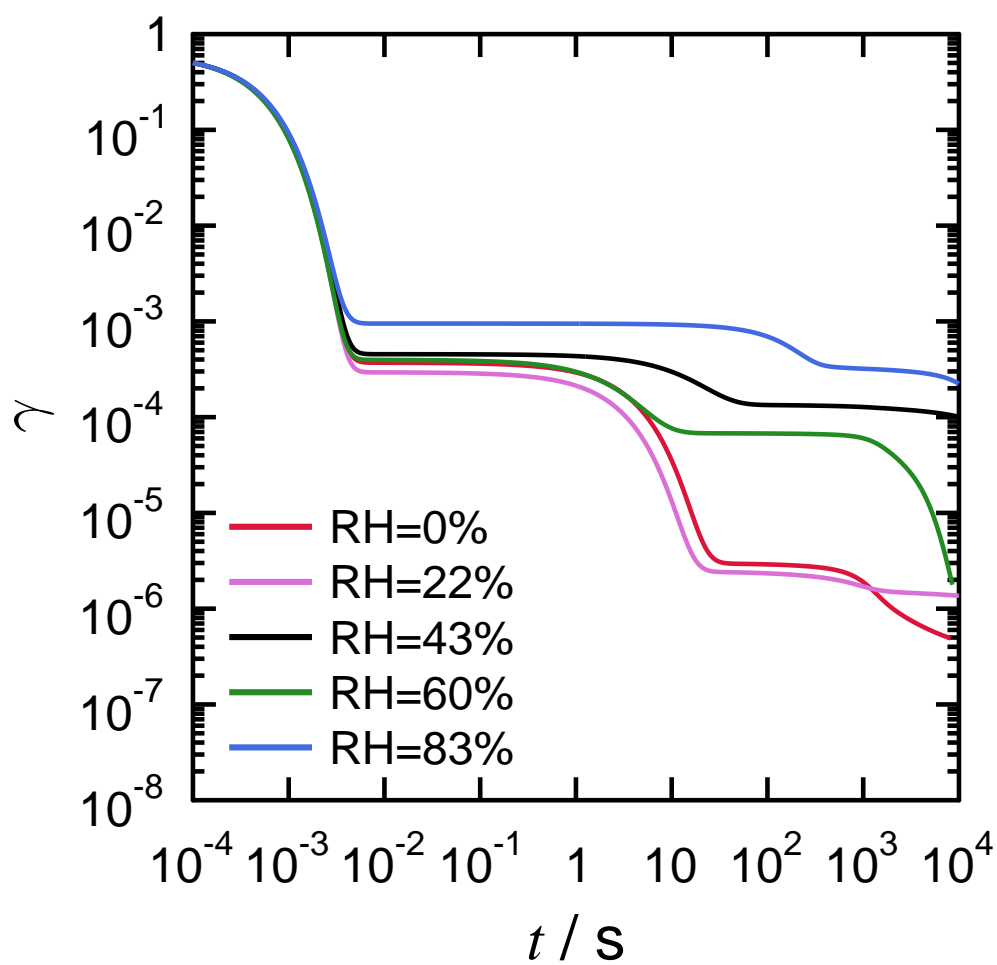

Figure S9: Calculated reactive uptake coefficients,  $\gamma$ , from the KM-SUB model as a function of time,  $t$ , for all experiments. Relative humidity,  $RH$ , is indicated.

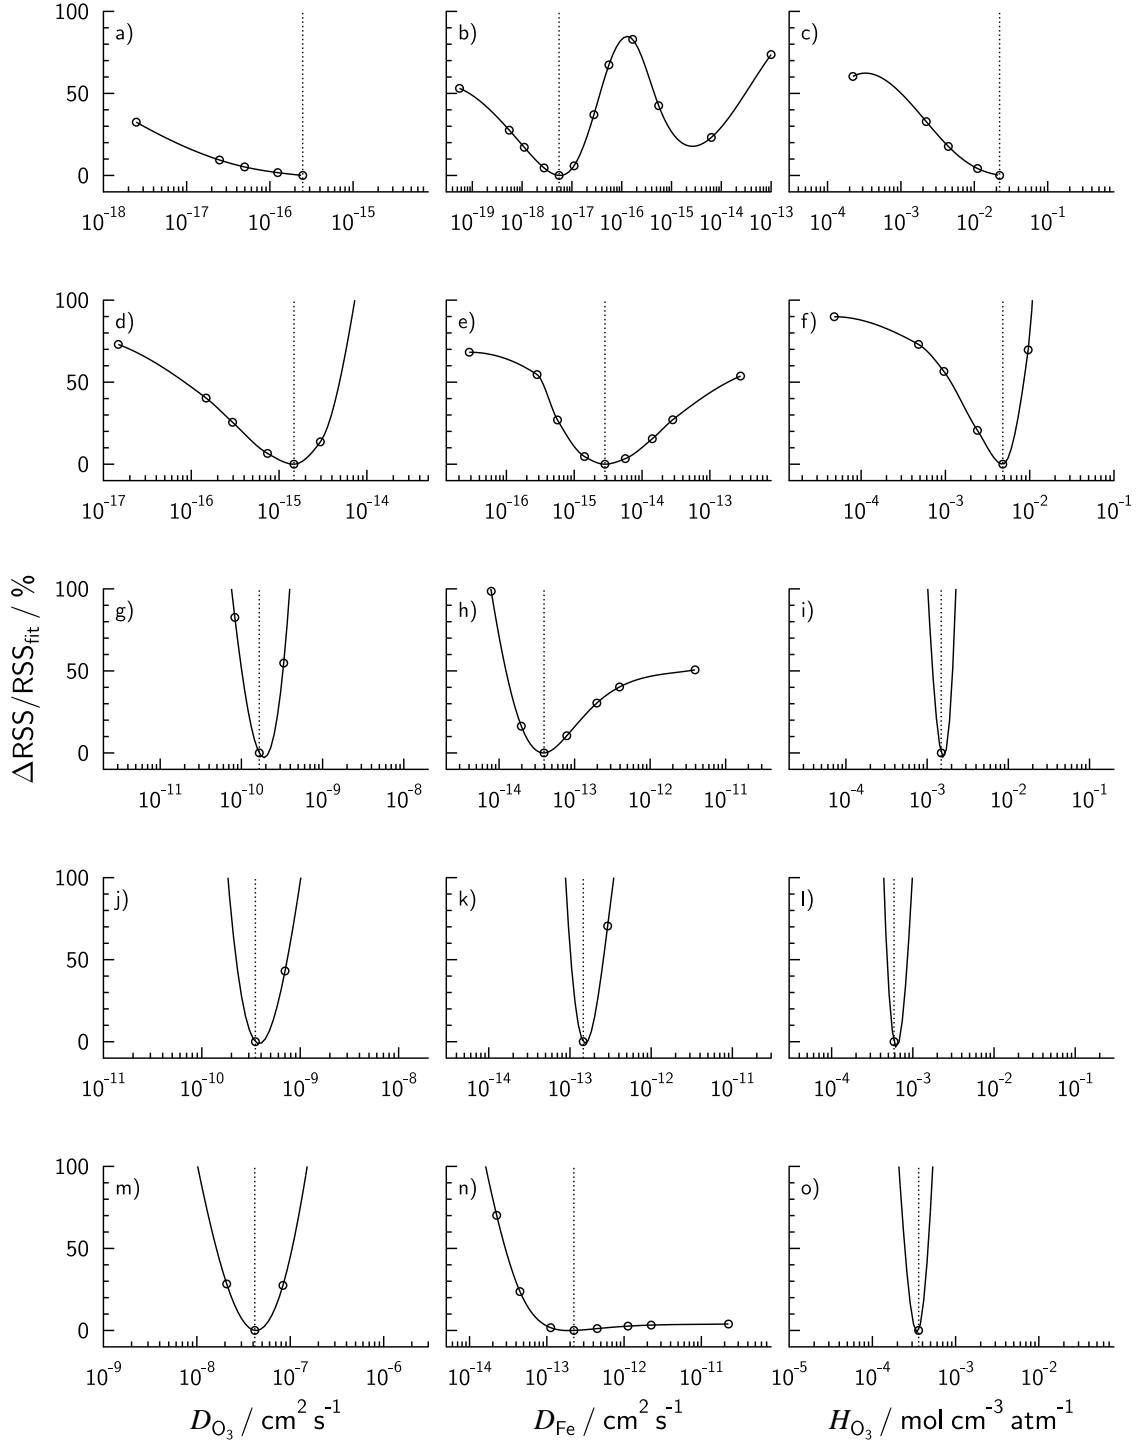

Figure S10: Model sensitivity on the fitted ozone diffusion coefficient,  $D_{\text{O}_3}$ , iron diffusion coefficient,  $D_{\text{Fe}}$ , and ozone Henry's Law constant,  $H_{\text{O}_3}$ , at (a-c) 0%, (d-f) 22%, (g-i) 43%, (j-l) 60% and (m-o) 80%. The percent change in the sum of the squared residual values (RSS) was determined as  $\Delta\text{RSS}/\text{RSS}_{\text{fit}}$ , where  $\text{RSS}_{\text{fit}}$  is the minimized value and  $\Delta\text{RSS}$  is the deviation from  $\text{RSS}_{\text{fit}}$  when a parameter is raised or lowered from its optimal value indicated by the vertical dotted line. Symbols are individually calculated points spanning 4 orders of magnitude and solid lines are a third order spline interpolation.

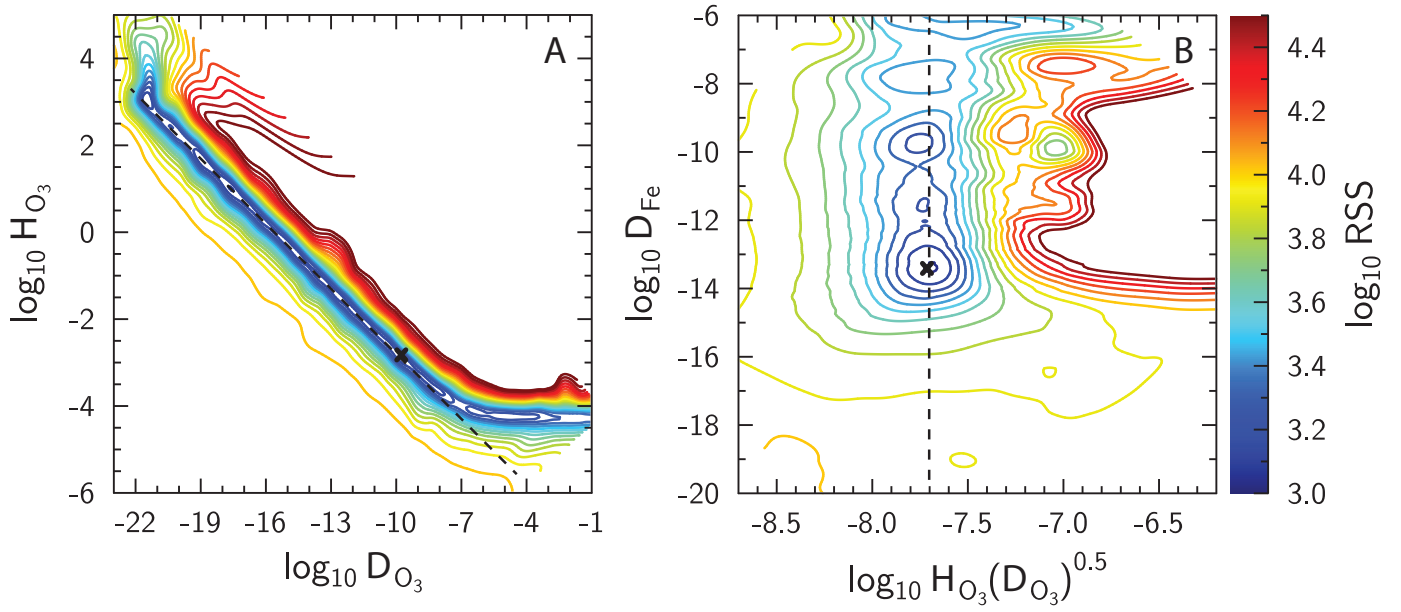

Figure S11: Model sensitivity on the fitted parameters in the KM-SUB model. (a) The ozone diffusion coefficient,  $D_{O_3}$ , and Henry's Law constant,  $H_{O_3}$ , was varied simultaneously keeping the iron diffusion coefficient,  $D_{Fe}$ , constant. (b) All three parameters were varied simultaneously where the abscissa is the product of  $H_{O_3}\sqrt{D_{O_3}}$ . The dashed line indicates  $H_{O_3}\sqrt{D_{O_3}} = -7.7$ . The color contours are the sum of the squared residual values (RSS) on a logarithmic scale.

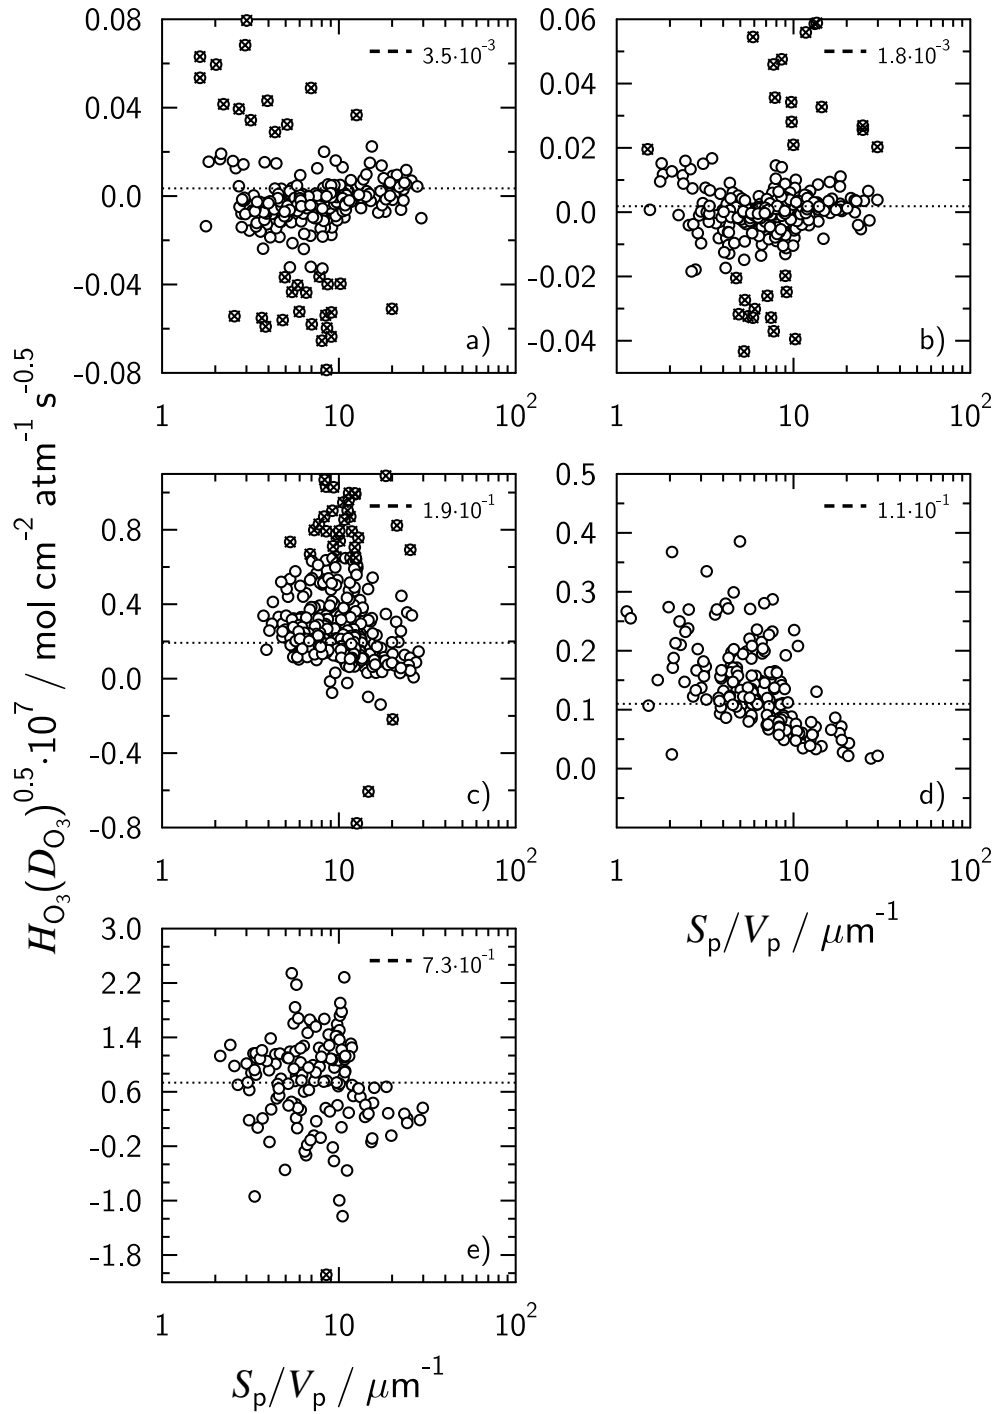

Figure S12: The product of Henry's Law coefficient for ozone,  $H_{O_3}$ , and the square root of the diffusion coefficient of ozone,  $D_{O_3}$ , or  $H_{O_3}\sqrt{D_{O_3}}$ , as a function of particle surface to volume ratio,  $S_p/V_p$ , at a relative humidity  $RH$  of a) 0%, b) 22%, c) 43%, d) 60% and e) 80%. Each data point is an individual particle. Values which deviate more than 3x the average deviation of the median are indicated with an "x". The dotted line is derived from fitted parameters and its value indicated in each panel.

## 338 References

- 339 [1] S. S. Steimer, M. Lampimäki, E. Coz, G. Grzinic and M. Ammann, *Atmos. Chem. Phys.*, 2014, **14**, 10761–10772.
- 340 [2] C.-E. Brunchi, M. Bercea, S. Morariu and M. Dascalu, *Journal of Polymer Research*, 2016, **23**, 123.
- 341 [3] T. Huthwelker, V. Zelenay, M. Birrer, A. Krepelova, J. Raabe, G. Tzvetkov, M. G. C. Vernooij and M. Ammann,  
342 *Rev. Sci. Instrum.*, 2010, **81**, 113706.
- 343 [4] J.-D. Förster, C. Pöhlker, C. Gurk, M. Lamneck, M. Ammann, U. Pöschl and M. O. Andreae, *Atmos. Mech. Tech.*,  
344 2019, to be submitted.
- 345 [5] R. C. Moffet, T. Henn, A. Laskin and M. K. Gilles, *Anal. Chem.*, 2010, **82**, 7906–7914.
- 346 [6] R. C. Moffet, A. V. Tivanski and M. K. Gilles, in *Fundamentals and Applications in Aerosol Spectroscopy*, ed.  
347 R. Signorell and J. P. Reid, Taylor and Francis Group, LLC, Boca Raton, FL, 2011, ch. 17. Scanning Transmission  
348 X-ray Microscopy: Applications in Atmospheric Aerosol Research, pp. 419–462.
- 349 [7] L. A. J. Garvie, A. J. Craven and R. Brydson, *Am. Mineral.*, 1994, **79**, 411–425.
- 350 [8] R. C. Moffet, H. Furutani, T. C. Rödel, T. R. Henn, P. O. Sprau, A. Laskin, M. Uematsu and M. K. Gilles, *J.*  
351 *Geophys. Res.*, 2012, **117**, D07204.
- 352 [9] T. Berkemeier, S. S. Steimer, U. K. Krieger, T. Peter, U. Pöschl, M. Ammann and M. Shiraiwa, *Phys. Chem. Chem.*  
353 *Phys.*, 2016, **18**, 12662–12674.
- 354 [10] R. D. Shannon, *Acta Cryst.*, 1976, **32**, 751–767.
- 355 [11] K. W. Dawson, M. D. Petters, N. Meskhidze, S. S. Petters and S. M. Kreidenweis, *J. Geophys. Res.*, 2016, **121**,  
356 11803–11818.
- 357 [12] R. S. Smith and B. D. Kay, *Nature*, 1999, **398**, 788–791.
- 358 [13] D. R. Worsnop, J. W. Morris, Q. Shi, P. Davidovits and C. E. Kolb, *Geophys. Res. Lett.*, 2002, **29**, GL015542.
- 359 [14] D. R. Hanson, A. R. Ravishankara and S. Solomon, *J. Geophys. Res.*, 1994, **99**, 3615–3629.
- 360 [15] D. R. Hanson and E. R. Lovejoy, *Science*, 1995, **267**, 1326–1328.
- 361 [16] R. Sander, *Atmos. Chem. Phys.*, 2015, **15**, 4399–4981.
- 362 [17] P. Vanýsek, in *CRC Handbook of Chemistry and Physics*, 82<sup>nd</sup> edition, ed. D. R. Lide, CRC Press, Boca Raton, FL,  
363 USA, 2001, ch. Ionic conductivity and diffusion at infinite dilution, pp. 5–95.
